# Supplementary material for: Identification of Myelin Basic Protein Proximity Interactome Using TurboID Labeling Proteomics
Source: MDPI journal article supplement (doi:10.3390/cells12060944), 2023-03-20
Supplement: s1 [file s1]

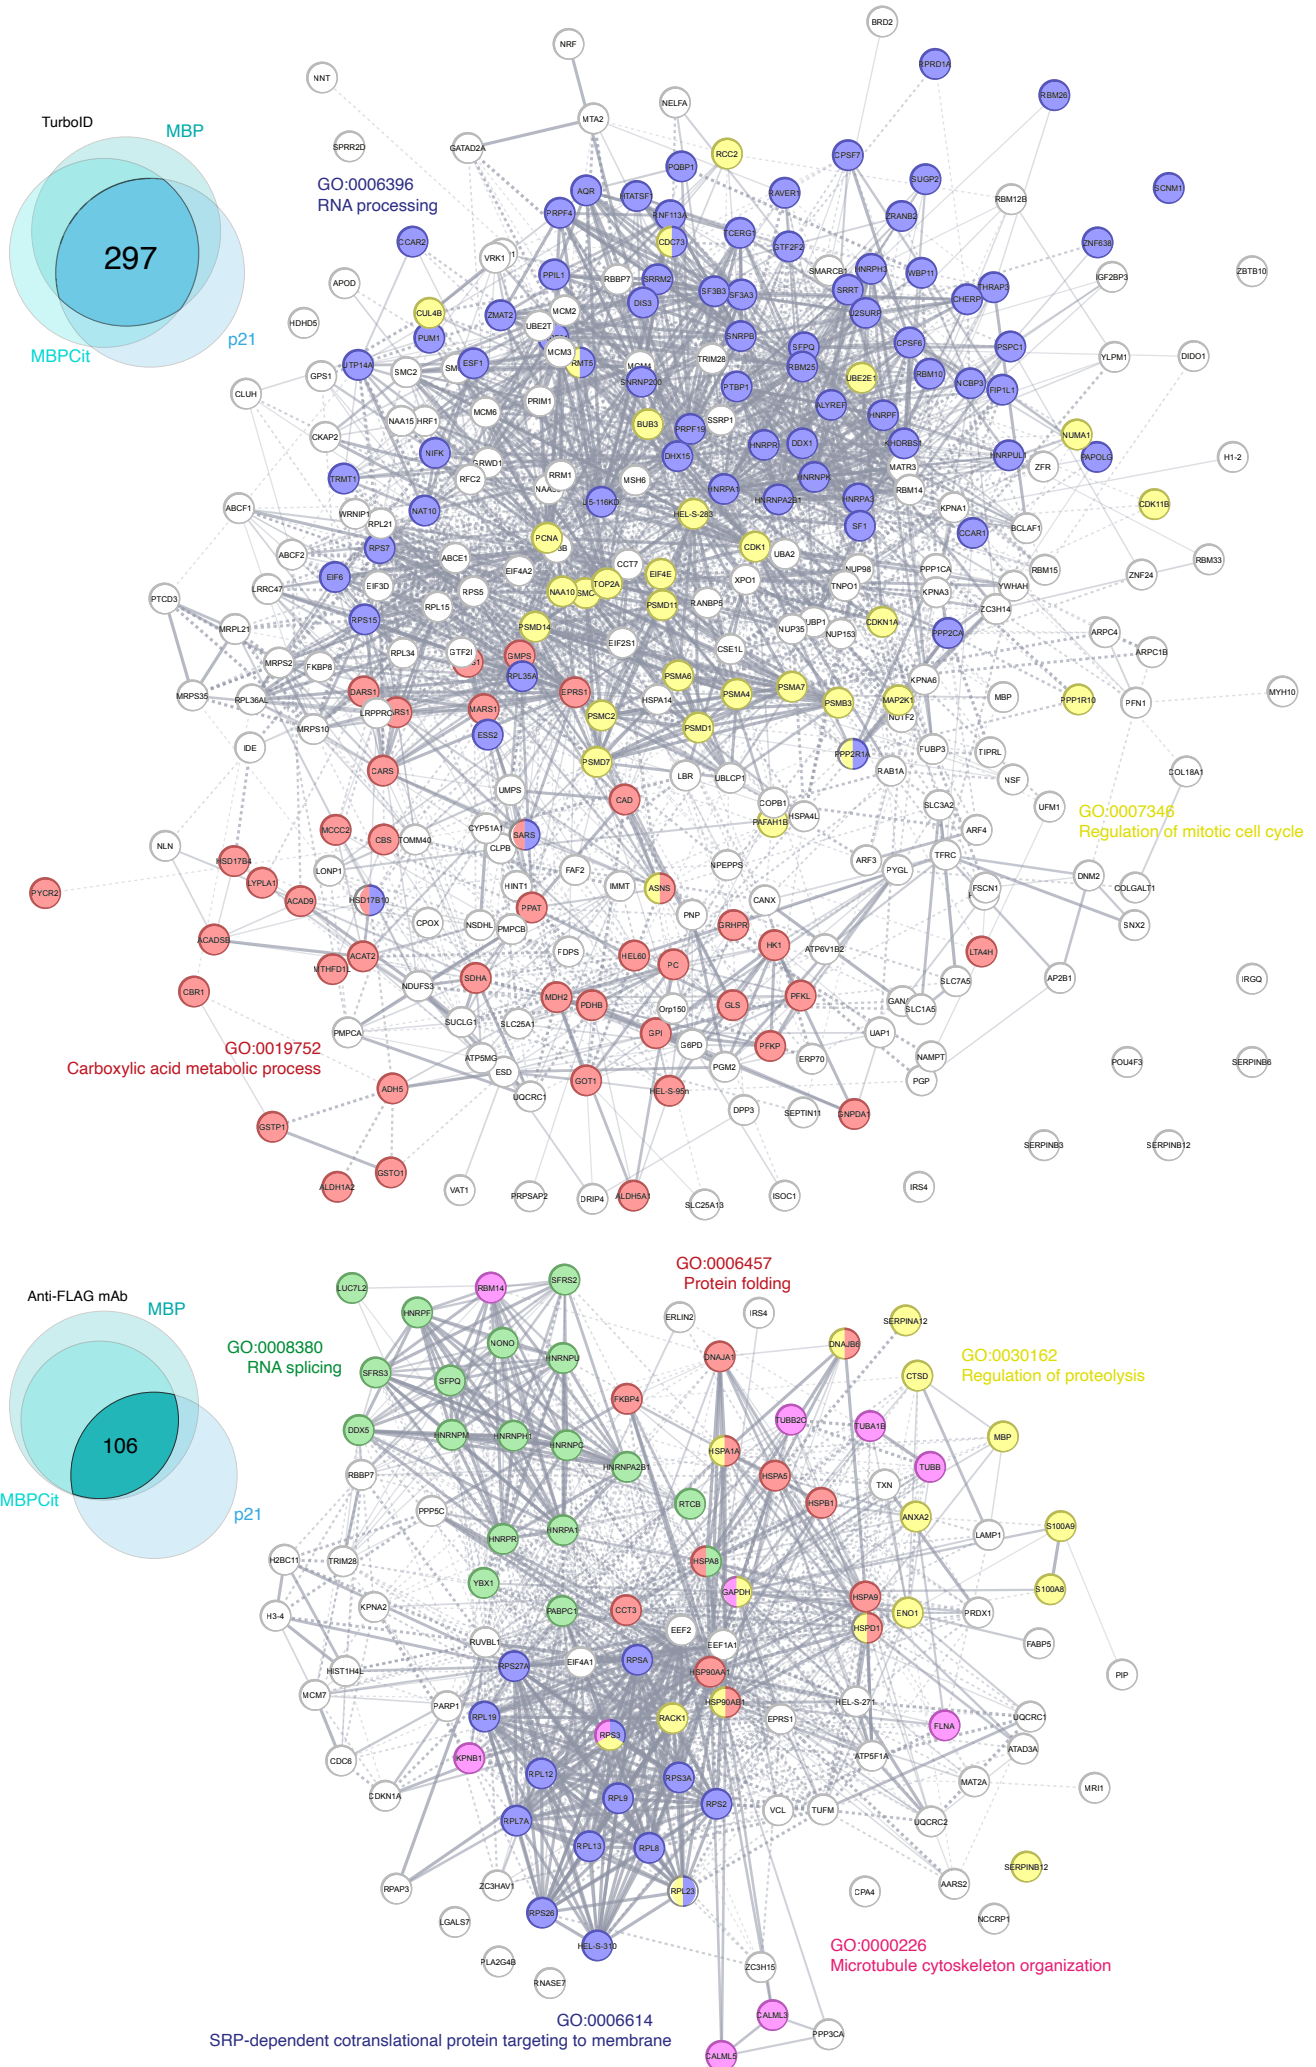

**Figure S2.** Interaction network between common interactors for MBP, MBPCit, and p21 identified by TurboID (top) and FLAG-IP (bottom) methods. The amount of identified proteins involved in the analysis is shown in the respective Venn diagram. Each color indicates belonging to a specific metabolic pathway of the cell, signed with the same color.
